# Supplementary material
Source: publisher site journal article supplement (http://kjim.org/upload/media/kjim-2022-249_suppl2.pdf)
Supplement: Supplementary file 1 [file kjim-2022-249_suppl2.pdf]

**Supplementary Table 2. Cumulative incidence of CV events in hypertensive group and non-hypertensive group: incidence rate (in 10 years) of CV events in hypertensive group and non-hypertensive group.**

| Group                    | Incidence    |              |                         | <i>p</i> value |
|--------------------------|--------------|--------------|-------------------------|----------------|
|                          | No. of event | Person year  | Incidence rate (95% CI) |                |
| Major CV events or death |              |              |                         | < 0.001        |
| Hypertensive             | 2,178        | 35,968,235.4 | 0.61 (0.58–0.63)        |                |
| Non-hypertensive         | 12,444       | 383,126,567  | 0.32 (0.32–0.33)        |                |
| Major CV events          |              |              |                         | < 0.001        |
| Hypertensive             | 1,591        | 36,751,576.4 | 0.55 (0.53–0.57)        |                |
| Non-hypertensive         | 7,635        | 387,560,482  | 0.2 (0.2–0.2)           |                |
| Death                    |              |              |                         | < 0.001        |
| Hypertensive             | 588          | 35,968,235.4 | 0.16 (0.15–0.17)        |                |
| Non-hypertensive         | 4,826        | 383,126,567  | 0.13 (0.12–0.13)        |                |

CV, cardiovascular; CI, confidential interval.
